# Supplementary material for: Functional Gene Expression Profiling in Yeast Implicates Translational Dysfunction in Mutant Huntingtin Toxicity
Source: PubMed Central journal article supplement — J Biol Chem. 2010 Nov 2;286(1):410–9. doi: 10.1074/jbc.M110.101527 (PMC3012999; doi:10.1074/jbc.m110.101527), 2010-11-02

## Supplemental Data

**Table S1.** Validation of differentially expressed genes identified via microarray analysis by QPCR.

| Gene              | Fold Change<br>Microarray | Fold Change<br>QPCR | P-value | Expression |
|-------------------|---------------------------|---------------------|---------|------------|
| <i>AQR1*</i>      | -10.22                    | -2.19               | 0.002   | Down       |
| <i>BAG7*</i>      | 13.68                     | 2.19                | < 0.001 | Up         |
| <i>DAK2*</i>      | 25.27                     | 1.86                | < 0.001 | Up         |
| <i>HSP26</i>      | 5.80                      | 0.57                | 0.102   | No change  |
| <i>HXT2</i>       | -5.52                     | 1.55                | 0.008   | Up         |
| <i>PHM6</i>       | -9.53                     | 1.31                | 0.676   | No change  |
| <i>PHO84</i>      | -4.80                     | 1.22                | 0.261   | No change  |
| <i>PRM7</i>       | -5.71                     | -1.31               | 0.238   | No change  |
| <i>SPL2*</i>      | -4.74                     | -1.52               | 0.021   | Down       |
| <i>SRX1*</i>      | 8.58                      | 2.51                | 0.001   | Up         |
| <i>TMA10*</i>     | 9.76                      | 2.01                | < 0.001 | Up         |
| <i>YDR034W-B*</i> | 11.72                     | 3.61                | 0.001   | Up         |
| <i>YGR079W</i>    | -5.03                     | 1.00                | 0.964   | No change  |
| <i>YLR194C*</i>   | 15.02                     | 3.07                | < 0.001 | Up         |
| <i>YOR338W</i>    | -6.02                     | 1.54                | 0.055   | No change  |
| <i>YPK2</i>       | 4.28                      | 1.27                | 0.223   | No change  |
| <i>YPR077C*</i>   | 4.17                      | 8.73                | < 0.001 | Up         |

The majority of DEGs identified by microarray analysis were validated by QPCR (9/17; 53%, indicated by astericks). An additional 3 genes were found to be differentially expressed via QPCR analysis in the same direction as observed by mRNA profiling, but failed to reach statistical significance.

**Table S2.** Gene ontology groups significantly up-regulated in Htt103Q versus Htt25Q expressing yeast cells.

| Gene Ontology Group                               | Count | %    | P-value | Enrichment |
|---------------------------------------------------|-------|------|---------|------------|
| response to unfolded protein                      | 11    | 5.0  | 6.2E-06 | 6.3        |
| response to stimulus                              | 42    | 18.9 | 1.9E-04 | 1.7        |
| response to stress                                | 31    | 14.0 | 2.1E-04 | 2.0        |
| response to chemical stimulus                     | 27    | 12.2 | 2.9E-04 | 2.1        |
| protein folding                                   | 13    | 5.9  | 7.8E-04 | 3.1        |
| ubiquitin cycle                                   | 12    | 5.4  | 1.7E-03 | 3.1        |
| cell wall organization and biogenesis             | 15    | 6.8  | 2.1E-03 | 2.5        |
| protein metabolic process                         | 58    | 26.1 | 2.9E-03 | 1.4        |
| protein ubiquitination                            | 8     | 3.6  | 3.0E-03 | 4.1        |
| cellular macromolecule metabolic process          | 58    | 26.1 | 3.2E-03 | 1.4        |
| cellular protein metabolic process                | 55    | 24.8 | 6.2E-03 | 1.4        |
| post-translational protein modification           | 24    | 10.8 | 6.5E-03 | 1.8        |
| chitin- and beta-glucan-cell wall biogenesis      | 6     | 2.7  | 8.6E-03 | 4.6        |
| protein modification by small protein conjugation | 8     | 3.6  | 1.1E-02 | 3.2        |
| cellular carbohydrate metabolic process           | 14    | 6.3  | 2.2E-02 | 2.0        |
| catabolic process                                 | 23    | 10.4 | 2.4E-02 | 1.6        |
| protein refolding                                 | 3     | 1.4  | 2.9E-02 | 10.9       |
| cotranslational protein targeting to membrane     | 3     | 1.4  | 3.5E-02 | 9.9        |
| hexose metabolic process                          | 8     | 3.6  | 3.7E-02 | 2.5        |
| glucose metabolic process                         | 7     | 3.2  | 3.7E-02 | 2.8        |
| carbohydrate metabolic process                    | 15    | 6.8  | 3.9E-02 | 1.8        |
| signal transduction                               | 14    | 6.3  | 4.0E-02 | 1.8        |
| vacuolar protein catabolic process                | 3     | 1.4  | 4.1E-02 | 9.1        |
| monosaccharide metabolic process                  | 8     | 3.6  | 4.8E-02 | 2.4        |

Gene ontology groups determined by the DAVID Functional Annotation tool. Count refers to number of genes within input gene list that fall into the specified GO group. % denotes what percentage of the total input genes analyzed fall within the specific GO group. P-value represents the threshold of EASE Score, a modified Fisher Exact P-Value, for gene-enrichment analysis. Enrichment category denotes the overall enrichment of the particular GO group over background.

**Table S3.** Gene ontology groups significantly down-regulated in Htt103Q versus Htt25Q expressing yeast cells.

| Gene Ontology Group                                  | Count | %    | P-Value | Enrichment |
|------------------------------------------------------|-------|------|---------|------------|
| ribosome biogenesis and assembly                     | 74    | 31.2 | 7.5E-40 | 5.9        |
| ribonucleoprotein complex biogenesis                 | 75    | 31.7 | 3.6E-35 | 5.0        |
| rRNA metabolic process                               | 42    | 17.7 | 2.2E-21 | 5.9        |
| rRNA processing                                      | 41    | 17.3 | 5.1E-21 | 6.0        |
| RNA processing                                       | 54    | 22.8 | 6.9E-16 | 3.3        |
| organelle organization and biogenesis                | 95    | 40.1 | 5.0E-13 | 1.9        |
| ribosomal large subunit biogenesis and assembly      | 19    | 8.0  | 2.2E-12 | 8.5        |
| RNA metabolic process                                | 73    | 30.8 | 6.4E-08 | 1.8        |
| ribosome assembly                                    | 14    | 5.9  | 2.9E-07 | 6.1        |
| maturation of 5.8S rRNA from tricistronic rRNA       | 10    | 4.2  | 1.0E-06 | 8.8        |
| maturation of SSU-rRNA from tricistronic rRNA        | 11    | 4.6  | 1.2E-06 | 7.4        |
| maturation of SSU-rRNA                               | 12    | 5.1  | 1.5E-06 | 6.4        |
| maturation of 5.8S rRNA                              | 10    | 4.2  | 1.7E-06 | 8.3        |
| cellular component organization and biogenesis       | 109   | 46.0 | 8.2E-06 | 1.4        |
| ribosomal large subunit assembly                     | 9     | 3.8  | 7.1E-05 | 6.2        |
| ribosomal subunit assembly                           | 10    | 4.2  | 1.2E-04 | 5.1        |
| protein-RNA complex assembly                         | 15    | 6.3  | 3.7E-04 | 3.0        |
| cleavages during rRNA processing                     | 6     | 2.5  | 5.8E-04 | 8.3        |
| nucleobase, nucleoside, nucleotide metabolism        | 85    | 35.9 | 8.2E-04 | 1.3        |
| maturation of LSU-rRNA                               | 5     | 2.1  | 1.0E-03 | 10.4       |
| gene expression                                      | 73    | 30.8 | 1.1E-03 | 1.4        |
| endonucleolytic cleavage mature 5'-end of SSU-rRNA   | 5     | 2.1  | 2.8E-03 | 8.1        |
| establishment of organelle localization              | 8     | 3.4  | 3.4E-03 | 4.0        |
| endonucleolytic cleavage of tricistronic rRNA        | 5     | 2.1  | 3.5E-03 | 7.6        |
| RNA modification                                     | 9     | 3.8  | 3.5E-03 | 3.5        |
| transcription from RNA polymerase I promoter         | 6     | 2.5  | 6.3E-03 | 5.0        |
| positive regulation of RNA pol I transcription       | 3     | 1.3  | 6.7E-03 | 21.8       |
| tRNA processing                                      | 10    | 4.2  | 6.9E-03 | 2.9        |
| processing of 27S pre-rRNA                           | 4     | 1.7  | 8.8E-03 | 8.9        |
| biopolymer metabolic process                         | 96    | 40.5 | 9.4E-03 | 1.2        |
| tRNA modification                                    | 7     | 3.0  | 1.2E-02 | 3.6        |
| tRNA methylation                                     | 4     | 1.7  | 1.3E-02 | 7.7        |
| biopolymer methylation                               | 6     | 2.5  | 1.5E-02 | 4.0        |
| ribosome export from nucleus                         | 5     | 2.1  | 1.8E-02 | 4.8        |
| endonucleolytic cleavage 5'-ETS of tricistronic rRNA | 4     | 1.7  | 1.9E-02 | 6.8        |
| RNA methylation                                      | 4     | 1.7  | 2.2E-02 | 6.4        |
| tRNA metabolic process                               | 11    | 4.6  | 3.0E-02 | 2.2        |
| organelle localization                               | 8     | 3.4  | 3.2E-02 | 2.6        |

Gene ontology groups determined by the DAVID Functional Annotation tool. Count refers to number of genes within input gene list that fall into the specified GO group. % denotes what percentage of the total input genes analyzed fall within the specific GO group. P-value represents the threshold of EASE Score, a modified Fisher Exact P-Value, for gene-enrichment analysis. Enrichment category denotes the overall enrichment of the particular GO group over background.

**Table S4.** Gene ontology groups significantly differentially expressed in *bnr4Δ* Htt103Q-expressing yeast versus wild-type Htt103Q expressing cell.

| Gene Ontology Group                     | Count | %    | P-Value | Enrichment |
|-----------------------------------------|-------|------|---------|------------|
| carboxylic acid metabolic process       | 23    | 11.7 | 2.6E-05 | 2.7        |
| translational elongation                | 8     | 4.1  | 3.1E-04 | 6.0        |
| amino acid catabolic process            | 6     | 3.1  | 3.2E-04 | 9.6        |
| nitrogen compound metabolic process     | 18    | 9.2  | 3.3E-04 | 2.6        |
| amino acid and derivative metabolism    | 16    | 8.2  | 3.6E-04 | 2.9        |
| organic acid transport                  | 8     | 4.1  | 4.1E-04 | 5.7        |
| amine catabolic process                 | 6     | 3.1  | 5.9E-04 | 8.5        |
| amino acid metabolic process            | 15    | 7.7  | 6.0E-04 | 2.9        |
| amine metabolic process                 | 16    | 8.2  | 1.1E-03 | 2.6        |
| carboxylic acid transport               | 7     | 3.6  | 2.2E-03 | 5.1        |
| glutamine family amino acid metabolism  | 6     | 3.1  | 6.4E-03 | 5.0        |
| monocarboxylic acid metabolic process   | 10    | 5.1  | 6.5E-03 | 2.9        |
| biopolymer biosynthetic process         | 8     | 4.1  | 8.6E-03 | 3.4        |
| water-soluble vitamin metabolic process | 7     | 3.6  | 2.2E-02 | 3.2        |
| water-soluble vitamin biosynthesis      | 5     | 2.6  | 3.1E-02 | 4.2        |
| alcohol metabolic process               | 10    | 5.1  | 3.2E-02 | 2.2        |
| urea cycle intermediate metabolism      | 3     | 1.5  | 3.9E-02 | 9.3        |
| sterol transport                        | 3     | 1.5  | 3.9E-02 | 9.3        |
| arginine metabolic process              | 3     | 1.5  | 3.9E-02 | 9.3        |
| tyrosine catabolic process              | 2     | 1.0  | 4.2E-02 | 46.5       |
| L-phenylalanine catabolic process       | 2     | 1.0  | 4.2E-02 | 46.5       |
| vesicle organization and biogenesis     | 3     | 1.5  | 4.4E-02 | 8.7        |
| cellular biosynthetic process           | 27    | 13.8 | 4.5E-02 | 1.4        |
| catabolic process                       | 18    | 9.2  | 4.7E-02 | 1.6        |

Gene ontology groups determined by the DAVID Functional Annotation tool. Count refers to number of genes within input gene list that fall into the specified GO group. % denotes what percentage of the total input genes analyzed fall within the specific GO group. P-value represents the threshold of EASE Score, a modified Fisher Exact P-Value, for gene-enrichment analysis. Enrichment category denotes the overall enrichment of the particular GO group over background.

**Table S5.** Gene ontology groups significantly differentially expressed in *mbf1Δ* Htt103Q-expressing yeast versus wild-type Htt103Q expressing cells.

| Gene Ontology Group                              | Count | %    | P-Value | Enrichment |
|--------------------------------------------------|-------|------|---------|------------|
| amino acid metabolic process                     | 28    | 14.0 | 2.7E-12 | 5.0        |
| nitrogen compound metabolic process              | 29    | 14.5 | 2.4E-10 | 4.0        |
| lysine metabolic process                         | 8     | 4.0  | 3.1E-10 | 34.7       |
| lysine biosynthetic process via aminoadipic acid | 7     | 3.5  | 3.4E-09 | 38.0       |
| carboxylic acid metabolic process                | 30    | 15.0 | 1.2E-08 | 3.3        |
| aspartate family amino acid biosynthesis         | 10    | 5.0  | 3.0E-07 | 10.3       |
| aspartate family amino acid metabolic process    | 11    | 5.5  | 6.5E-07 | 8.1        |
| amine biosynthetic process                       | 16    | 8.0  | 1.6E-06 | 4.5        |
| amine catabolic process                          | 8     | 4.0  | 7.1E-06 | 12.0       |
| urea cycle intermediate metabolic process        | 6     | 3.0  | 1.4E-05 | 17.4       |
| nonprotein amino acid metabolic process          | 5     | 2.5  | 4.9E-05 | 21.7       |
| glutamine family amino acid metabolic process    | 8     | 4.0  | 2.5E-04 | 6.2        |
| ornithine metabolic process                      | 4     | 2.0  | 3.8E-04 | 24.8       |
| cellular biosynthetic process                    | 36    | 18.0 | 4.1E-04 | 1.8        |
| arginine biosynthetic process                    | 4     | 2.0  | 1.2E-03 | 17.4       |
| translational elongation                         | 7     | 3.5  | 2.7E-03 | 4.9        |
| carboxylic acid transport                        | 7     | 3.5  | 3.2E-03 | 4.7        |
| serine family amino acid catabolic process       | 3     | 1.5  | 7.3E-03 | 21.7       |
| amine transport                                  | 6     | 3.0  | 8.0E-03 | 4.7        |
| serine family amino acid metabolic process       | 5     | 2.5  | 1.5E-02 | 5.2        |
| glutamine family amino acid catabolic process    | 3     | 1.5  | 2.1E-02 | 13.0       |
| glycine metabolic process                        | 3     | 1.5  | 2.1E-02 | 13.0       |
| amino acid transport                             | 5     | 2.5  | 2.2E-02 | 4.6        |
| biosynthetic process                             | 37    | 18.5 | 2.3E-02 | 1.4        |
| polyamine transport                              | 3     | 1.5  | 2.9E-02 | 10.8       |
| glutamine family amino acid biosynthesis         | 4     | 2.0  | 3.3E-02 | 5.6        |
| biopolymer biosynthetic process                  | 7     | 3.5  | 3.9E-02 | 2.8        |
| tyrosine catabolic process                       | 2     | 1.0  | 4.5E-02 | 43.4       |
| L-phenylalanine catabolic process                | 2     | 1.0  | 4.5E-02 | 43.4       |
| arginine catabolic process                       | 2     | 1.0  | 4.5E-02 | 43.4       |
| translation                                      | 17    | 8.5  | 4.9E-02 | 1.6        |

Gene ontology groups determined by the DAVID Functional Annotation tool. Count refers to number of genes within input gene list that fall into the specified GO group. % denotes what percentage of the total input genes analyzed fall within the specific GO group. P-value represents the threshold of EASE Score, a modified Fisher Exact P-Value, for gene-enrichment analysis. Enrichment category denotes the overall enrichment of the particular GO group over background.

**Table S6.** Gene ontology groups significantly differentially expressed in *ume1* $\Delta$  Htt103Q-expressing yeast versus wild-type Htt103Q expressing cells.

| Gene Ontology Group                              | Count | %    | P-Value | Enrichment |
|--------------------------------------------------|-------|------|---------|------------|
| water-soluble vitamin biosynthetic process       | 8     | 4.0  | 1.2E-03 | 4.8        |
| NAD biosynthetic process                         | 4     | 2.0  | 1.9E-03 | 14.8       |
| nitrogen compound metabolic process              | 20    | 10.1 | 2.6E-03 | 2.1        |
| monocarboxylic acid metabolic process            | 13    | 6.5  | 2.6E-03 | 2.7        |
| response to pheromone                            | 10    | 5.0  | 3.9E-03 | 3.2        |
| G-protein coupled receptor protein signaling     | 6     | 3.0  | 5.0E-03 | 5.3        |
| response to chemical stimulus                    | 25    | 12.6 | 5.2E-03 | 1.8        |
| pyridine nucleotide biosynthetic process         | 4     | 2.0  | 7.4E-03 | 9.5        |
| response to pheromone / conjugation              | 7     | 3.5  | 8.5E-03 | 3.9        |
| regulation of catalytic activity                 | 7     | 3.5  | 8.5E-03 | 3.9        |
| water-soluble vitamin metabolic process          | 9     | 4.5  | 1.1E-02 | 2.9        |
| signal transduction during conjugation           | 5     | 2.5  | 1.1E-02 | 5.6        |
| carboxylic acid transport                        | 7     | 3.5  | 1.2E-02 | 3.6        |
| ammonium transport                               | 3     | 1.5  | 1.2E-02 | 16.7       |
| glutamate metabolic process                      | 4     | 2.0  | 1.3E-02 | 7.8        |
| regulation of conjugation with cellular fusion   | 5     | 2.5  | 1.4E-02 | 5.2        |
| carboxylic acid metabolic process                | 21    | 10.6 | 1.5E-02 | 1.7        |
| regulation of cyclin-dependent protein kinases   | 4     | 2.0  | 1.5E-02 | 7.4        |
| transport                                        | 49    | 24.6 | 1.6E-02 | 1.3        |
| amine transport                                  | 6     | 3.0  | 2.3E-02 | 3.6        |
| localization                                     | 50    | 25.1 | 2.4E-02 | 1.3        |
| amine metabolic process                          | 16    | 8.0  | 2.5E-02 | 1.8        |
| NAD metabolic process                            | 4     | 2.0  | 2.6E-02 | 6.1        |
| cell surface receptor linked signal transduction | 6     | 3.0  | 2.7E-02 | 3.5        |
| tricarboxylic acid cycle metabolism              | 4     | 2.0  | 3.0E-02 | 5.8        |
| conjugation with cellular fusion                 | 9     | 4.5  | 3.4E-02 | 2.4        |
| glyoxylate cycle                                 | 3     | 1.5  | 3.4E-02 | 10.0       |
| response to unfolded protein                     | 6     | 3.0  | 3.9E-02 | 3.2        |
| glyoxylate metabolic process                     | 3     | 1.5  | 4.1E-02 | 9.1        |

Gene ontology groups determined by the DAVID Functional Annotation tool. Count refers to number of genes within input gene list that fall into the specified GO group. % denotes what percentage of the total input genes analyzed fall within the specific GO group. P-value represents the threshold of EASE Score, a modified Fisher Exact P-Value, for gene-enrichment analysis. Enrichment category denotes the overall enrichment of the particular GO group over background.

**Table S7.** Validation of differentially expressed genes identified via microarray analysis in suppressor strains by QPCR.

| Gene           | <i>bna4</i> Δ103Q vs WT103Q |             |         | <i>mbf1</i> Δ103Q vs WT103Q |             |         | <i>ume1</i> Δ103Q vs WT103Q |             |         |
|----------------|-----------------------------|-------------|---------|-----------------------------|-------------|---------|-----------------------------|-------------|---------|
|                | Microarray                  | Fold Change | P-value | Microarray                  | Fold Change | P-value | Microarray                  | Fold Change | P value |
| <i>AQR1</i>    | Up*                         | 7.86        | <0.001  | Up                          | -3.04       | 0.088   | Up*                         | 2.216       | 0.002   |
| <i>DAK2</i>    | Down                        | 1.984       | 0.097   | Down*                       | -2.72       | 0.024   | Down                        | 1.606       | 0.01    |
| <i>YGR035C</i> | Up*                         | 6.543       | 0.008   | Up†                         | 3.087       | 0.197   | Up*                         | 5.044       | <0.001  |
| <i>YMC2</i>    | Up†                         | 1.974       | 0.099   | Up*                         | 2.83        | 0.031   | Up*                         | 4.31        | <0.001  |

Four DEGs (*AQR1*, *DAK2*, *YGR035C*, and *YMC2*) that were identified by microarray comparison of the three deletion suppressor strains (*bna4*Δ, *mbf1*Δ, *ume1*Δ) expressing Htt103Q versus WT expressing Htt103Q were validated by QPCR. Of the 12 comparisons, 7 were significantly confirmed by QPCR analysis (7/12; 58%, indicated by astericks). An additional 2 genes were found to be differentially expressed via QPCR analysis in the same direction as observed by mRNA profiling, but failed to reach statistical significance (indicated by †). Fold changes and P-values refer to QPCR data.

## Experimental Procedures

### Htt103Q Expression Levels

In order to analyze the level of Htt103Q protein expression in the yeast strains, protein extracts were analyzed by immunoblotting. SC -Ura -Leu GAL yeast cultures were inoculated from overnight SC -Ura -Leu raffinose (RAF) cultures to an OD<sub>600</sub> ~0.4, and were grown under inducing conditions for 5-6 hours. Cells were lysed by mechanical disruption with acid washed glass beads (425-600  $\mu$ m, Sigma, St. Louis, MO) and lysis buffer (50 mM Tris pH 7.5; 1X protease inhibitor cocktail, Roche), vortexing seven times for 30 sec each, with 1 min incubations on ice in between. Glass beads and cell debris were removed by centrifugation and protein extracts were quantified using the BioRad Protein Assay (BioRad, Hercules, CA). For SDS-PAGE, extracts were mixed with 4x Protein Sample Buffer (200mM Tris-HCl, 8% SDS, 40% glycerol, 0.4% bromophenol blue, 6%  $\beta$ -mercaptoethanol), boiled 10 min, and subjected to electrophoresis in 12% SDS-polyacrylamide gel. The proteins were transferred to nitrocellulose membranes. For dot blots, extracts were mixed with 2% SDS and captured in nitrocellulose membrane by vacuum. Htt103Q-GFP was identified by a monoclonal  $\alpha$ -GFP antibody (Santa Cruz Biotechnology, Inc), used at a 1:1000 dilution, followed by an  $\alpha$ -Mouse Ig horseradish peroxidase conjugated antibody (Amersham Bioscience, Piscataway, NJ) at 1:1000 dilution. The Gapdh loading control was detected using Gapdh antibodies (Ambion) at 1:4000 dilution. Detection was done by enhanced chemiluminescence (ECL) (Amersham Bioscience, Piscataway, NJ) and exposure to X-ray film.



## Figure Legend

Fig. S1. Expression of Htt103Q and Rnq1 in suppressor strains. (A) Expression levels of soluble Htt103Q-GFP were analyzed in the parental Y258 strain expressing *YORI*, *ENT3*, *IPI3*, *RRP9*, or an empty vector control by immunoblotting with GFP antibodies. Gapdh levels were detected with by immunoblotting with Gapdh antibodies and used as a loading control for the Western blot. An increase in soluble Htt103Q-GFP is observed in suppressor strains, suggesting decreased levels of aggregated Htt103Q-GFP (B) Equal amounts of the extracts in panel A were analysed by dot immunoblotting to quantify total levels of Htt103Q-GFP (soluble and aggregated), which showed no change in total Htt103Q-GFP expression levels in the suppressor strains (C) Rnq1 prion status with ORF suppressors (Y258 parental strain) expressing Htt103Q was determined by a combination of high-speed centrifugation and immunoblotting. “T” indicates total extract for each yeast strain, while “S” indicates supernatant fraction (soluble form of Rnq1), and “P” indicates pellet fraction (prion form of Rnq1). Immunoblotting with  $\alpha$ -Rnq1 antibody showed that Rnq1 is found in the pellet fraction for all suppressors, indicating the protein is in the prion conformation. The Y258 strain carrying empty vector (p425) or Htt103Q serve as a positive control, and treatment of cells carrying p425 with guanidine hydrochloride (GuHCL) cures Rnq1 prion, shifting this protein from the pellet fraction to the supernatant fraction.

# Figure S1

**A**

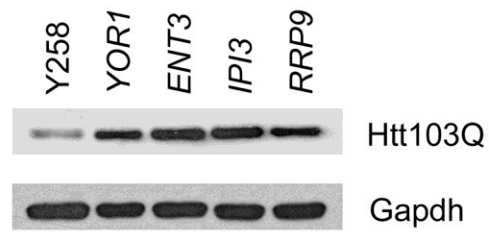

**B**

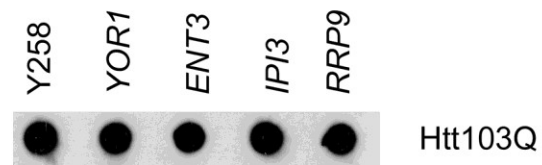

**C**

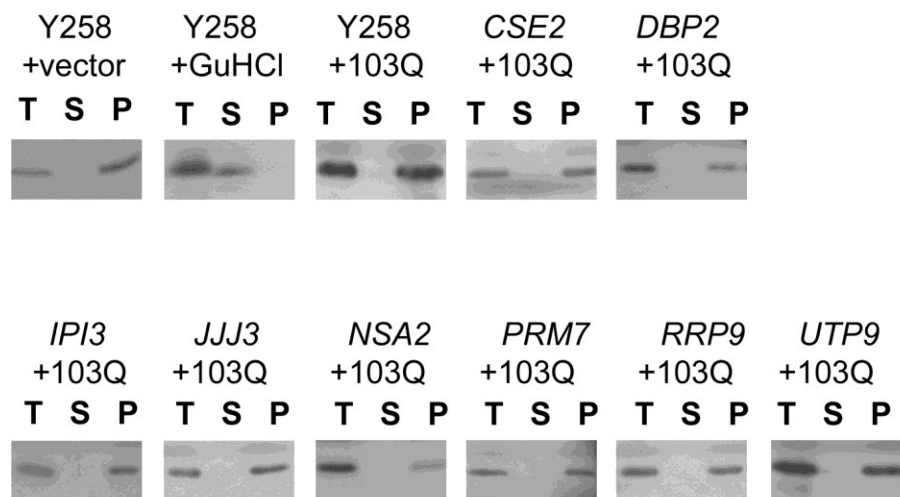

Supplement: supp_M110.101527_jbc.M110.101527-1.pdf [file supp_M110.101527_jbc.M110.101527-1.pdf]
